# Supplementary material for: Mobile Air Quality Monitoring and Comparison to Fixed Monitoring Sites for Quality Assurance
Source: Copernicus journal article supplement (doi:10.5194/amt-2023-82), 2023-05-02
Supplement: Supplementary file 1 [file amt-2023-82-supplement.pdf]

Supplemental Information for:

## **Mobile Air Quality Monitoring and Comparison to Fixed Reference Sites for Quality Assurance**

Andrew R. Whitehill<sup>1</sup>, Melissa Lunden<sup>2</sup>, Brian LaFranchi<sup>2</sup>, Surender Kaushik<sup>1</sup>, Paul A. Solomon<sup>2,a</sup>

<sup>1</sup>Center for Environmental Measurement and Modeling, Office of Research and Development, United States Environmental Protection Agency, Research Triangle Park, North Carolina, 27711, United States of America

<sup>2</sup>Aclima, Inc., San Francisco, California, 94111, United States of America

<sup>a</sup>formerly at: Office of Research and Development, United States Environmental Protection Agency, Las Vegas, Nevada, 89119, United States of America

*Correspondence to:* Andrew R. Whitehill (whitehill.andrew@epa.gov)

**Table S1:** Periods when at least one mobile monitoring platform was stationary and collocated with the CAMP site.

| Period | Date       | Start Time | End Time | Car   | <sup>1</sup> Distance (m) |
|--------|------------|------------|----------|-------|---------------------------|
| 1      | 2014-07-24 | 13:40      | 14:02    | Car 1 | 14                        |
| 2      | 2014-07-25 | 11:59      | 12:19    | Car 2 | 84                        |
| 3      | 2014-07-30 | 09:29      | 09:50    | Car 3 | 19                        |
| 4      | 2014-07-31 | 09:02      | 09:33    | Car 2 | 11                        |
| 5      | 2014-07-31 | 18:33      | 19:05    | Car 1 | 26                        |
| 6      | 2014-08-01 | 10:46      | 11:06    | Car 3 | 13                        |
| 7      | 2014-08-02 | 09:39      | 09:59    | Car 1 | 20                        |
| 8      | 2014-08-04 | 12:42      | 12:59    | Car 2 | 13                        |
| 9      | 2014-08-05 | 11:03      | 11:24    | Car 1 | 12                        |
| 10     | 2014-08-11 | 16:45      | 17:08    | Car 1 | 80                        |
| 11     | 2014-08-12 | 13:11      | 13:35    | Car 1 | 17                        |
| 12     | 2014-08-12 | 22:31      | 22:50    | Car 2 | 26                        |
| 13     | 2014-08-12 | 22:31      | 22:50    | Car 3 | 25                        |
| 14     | 2014-08-13 | 14:12      | 14:33    | Car 3 | 39                        |
| 15     | 2014-08-14 | 22:01      | 22:21    | Car 1 | 15                        |

<sup>1</sup>Horizontal distance based on GPS coordinates of the site (from the state air monitoring plan) and the car. Estimated uncertainty in distances is  $\pm 5$  m.

**Table S2:** Periods when at least one mobile monitoring platform was stationary and collocated with the La Casa site.

| Period | Date       | Start Time | End Time | Car   | <sup>1</sup> Distance (m) |
|--------|------------|------------|----------|-------|---------------------------|
| 1      | 2014-07-25 | 12:31      | 12:50    | Car 1 | 129                       |
| 2      | 2014-07-28 | 11:31      | 11:59    | Car 2 | 94                        |
| 3      | 2014-07-28 | 16:59      | 17:18    | Car 3 | 81                        |
| 4      | 2014-07-29 | 09:16      | 09:37    | Car 3 | 85                        |
| 5      | 2014-07-29 | 14:53      | 15:12    | Car 1 | 145                       |
| 6      | 2014-07-29 | 15:53      | 16:12    | Car 3 | 92                        |
| 7      | 2014-07-31 | 07:17      | 07:40    | Car 3 | 84                        |
| 8      | 2014-07-31 | 08:33      | 08:52    | Car 1 | 123                       |
| 9      | 2014-07-31 | 11:23      | 11:42    | Car 1 | 125                       |
| 10     | 2014-07-31 | 13:25      | 13:46    | Car 3 | 82                        |
| 11     | 2014-07-31 | 21:23      | 21:43    | Car 2 | 132                       |
| 12     | 2014-08-01 | 00:14      | 00:34    | Car 2 | 140                       |
| 13     | 2014-08-02 | 10:10      | 10:34    | Car 1 | 94                        |
| 14     | 2014-08-02 | 12:00      | 12:21    | Car 1 | 87                        |
| 15     | 2014-08-08 | 20:29      | 20:48    | Car 3 | 137                       |
| 16     | 2014-08-08 | 21:37      | 21:57    | Car 2 | 112                       |

<sup>1</sup>Horizontal distance based on GPS coordinates of the site (from the state air monitoring plan) and the car. Estimated uncertainty in distances is  $\pm 5$  m.

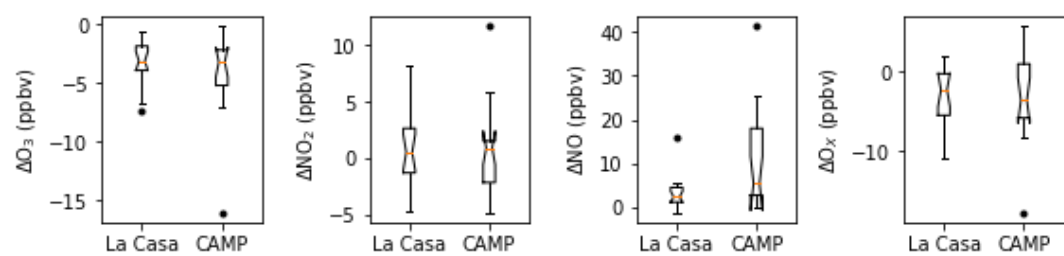

**Figure S1:** Distribution of median (by collocation period) 1-minute  $\Delta O_3$ ,  $\Delta NO_2$ ,  $\Delta NO$ , and  $\Delta O_x$  from the side-by-side parked comparison periods at La Casa and CAMP.

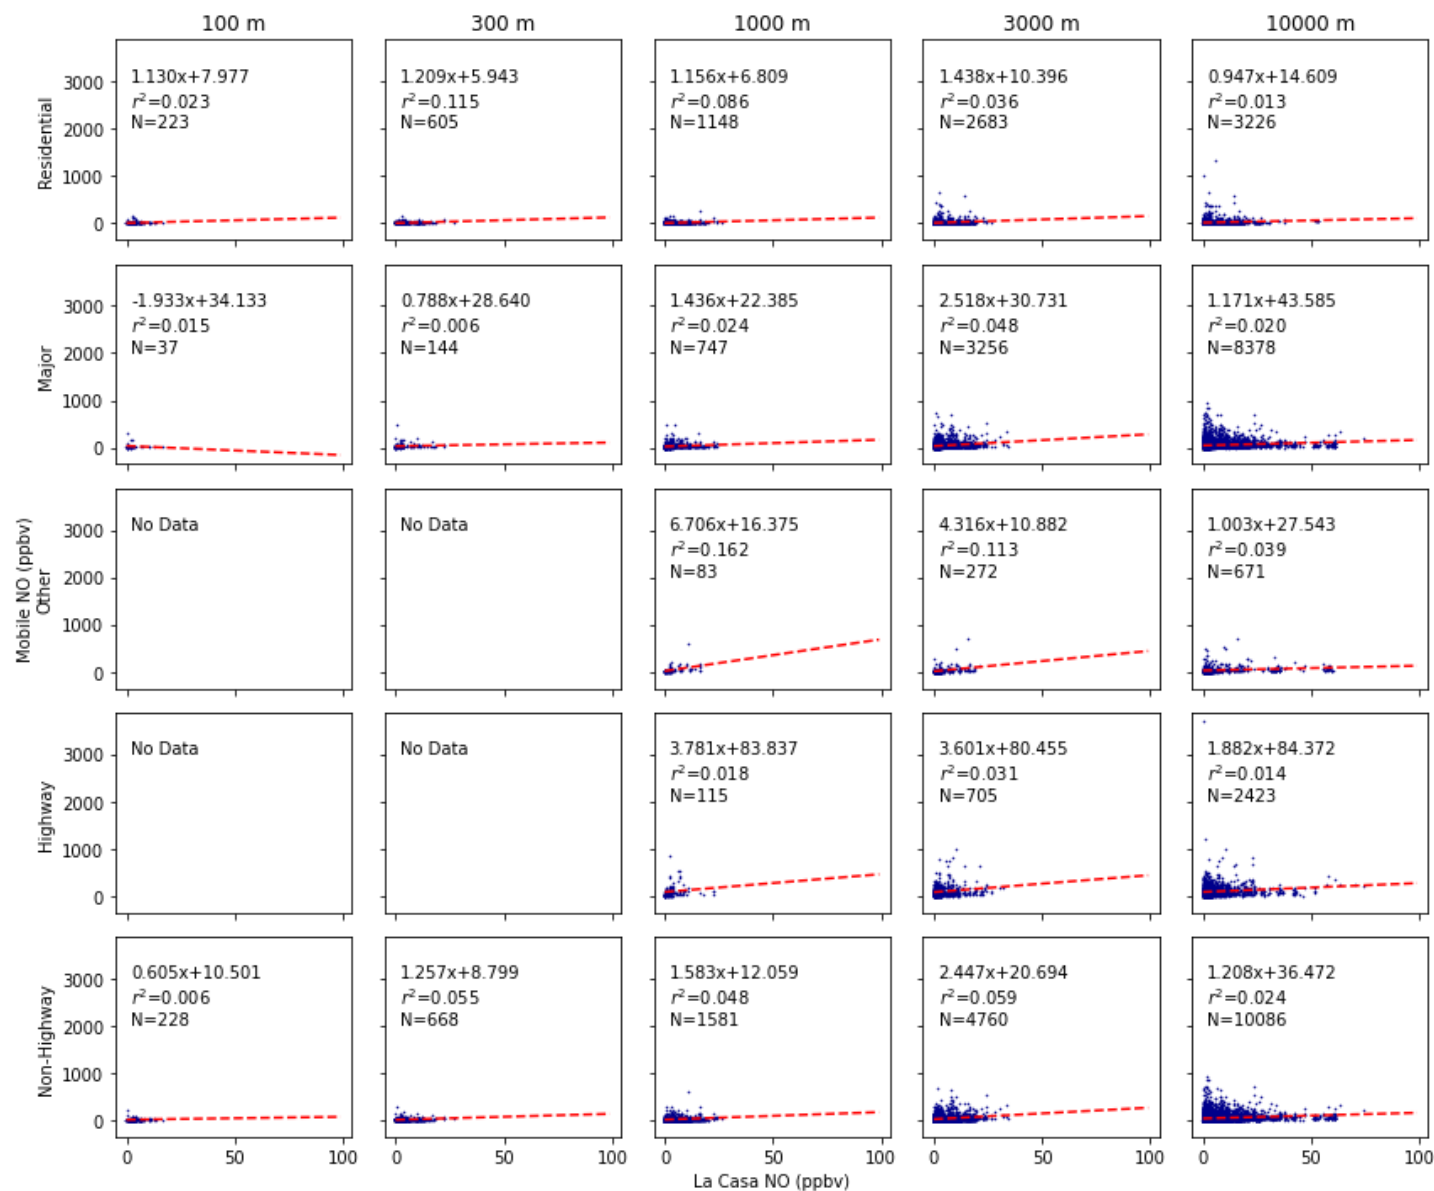

**Figure S2:** Scatterplots of 1-minute average mobile platform versus 1-minute fixed reference site NO for different road classes within five distance buffers of the fixed reference sites in the Denver study. The red dashed lines show the result of the ordinary least squares regression.

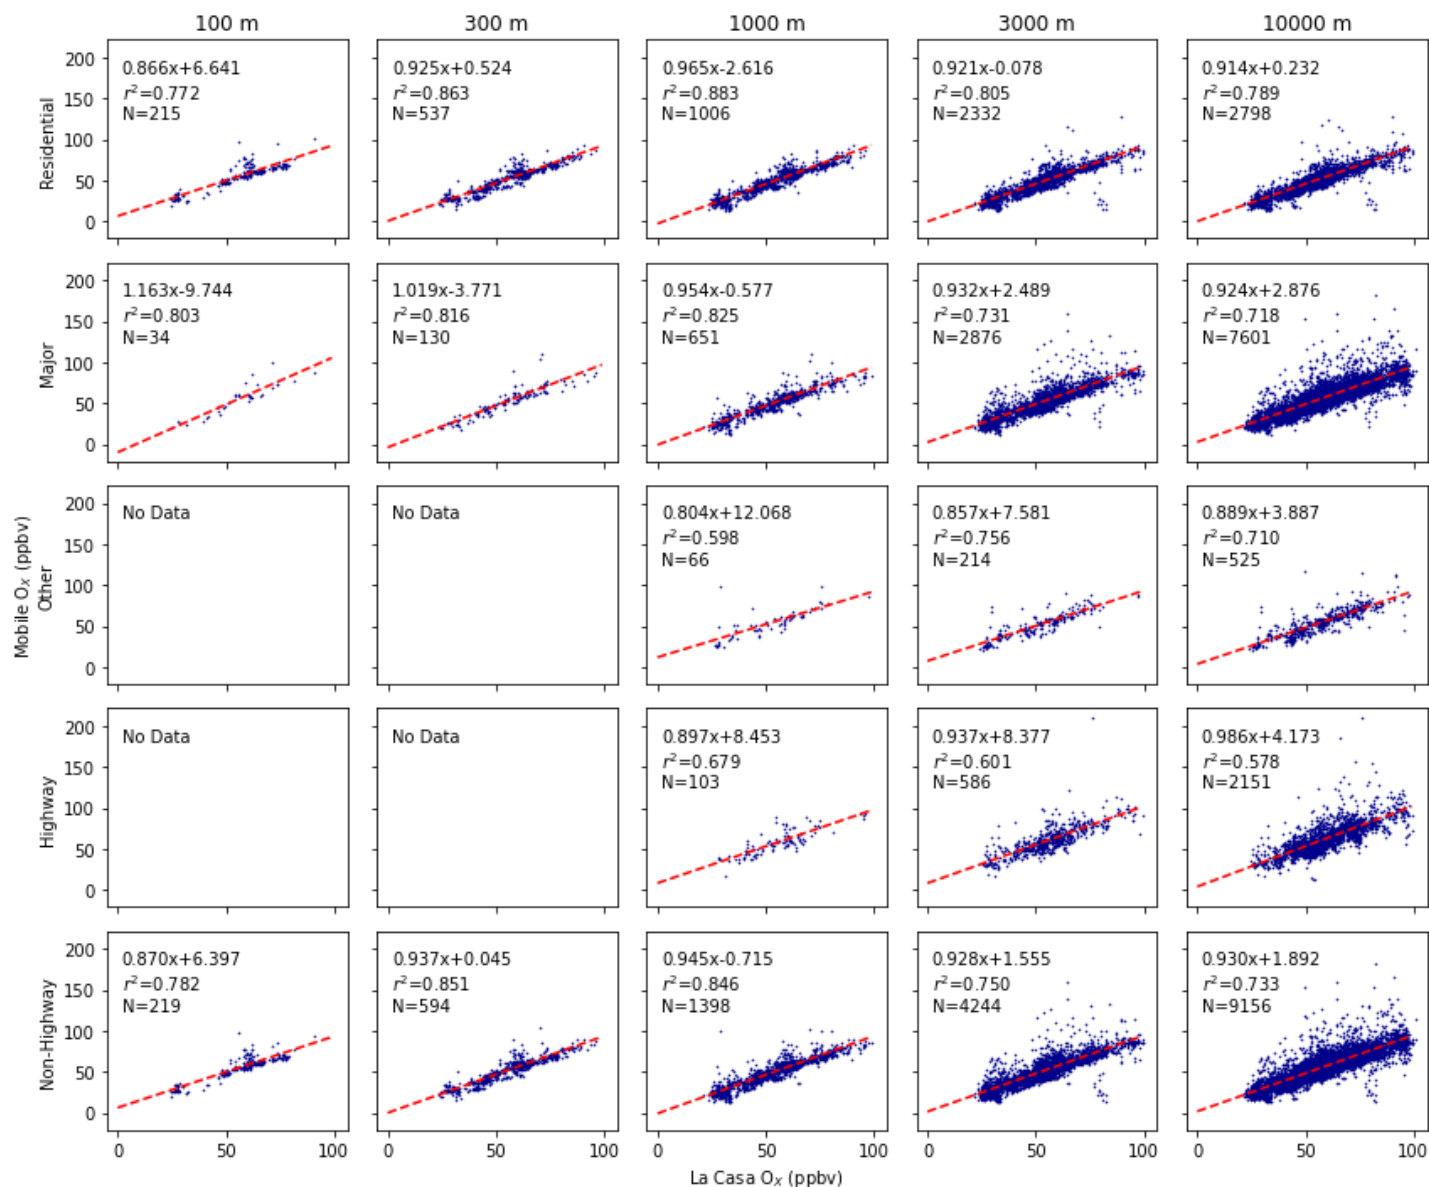

**Figure S3:** Scatterplots of 1-minute average mobile platform versus 1-minute fixed reference site O<sub>x</sub> for different road classes within five distance buffers of the fixed reference sites in the Denver study. The red dashed lines show the result of the ordinary least squares regression.

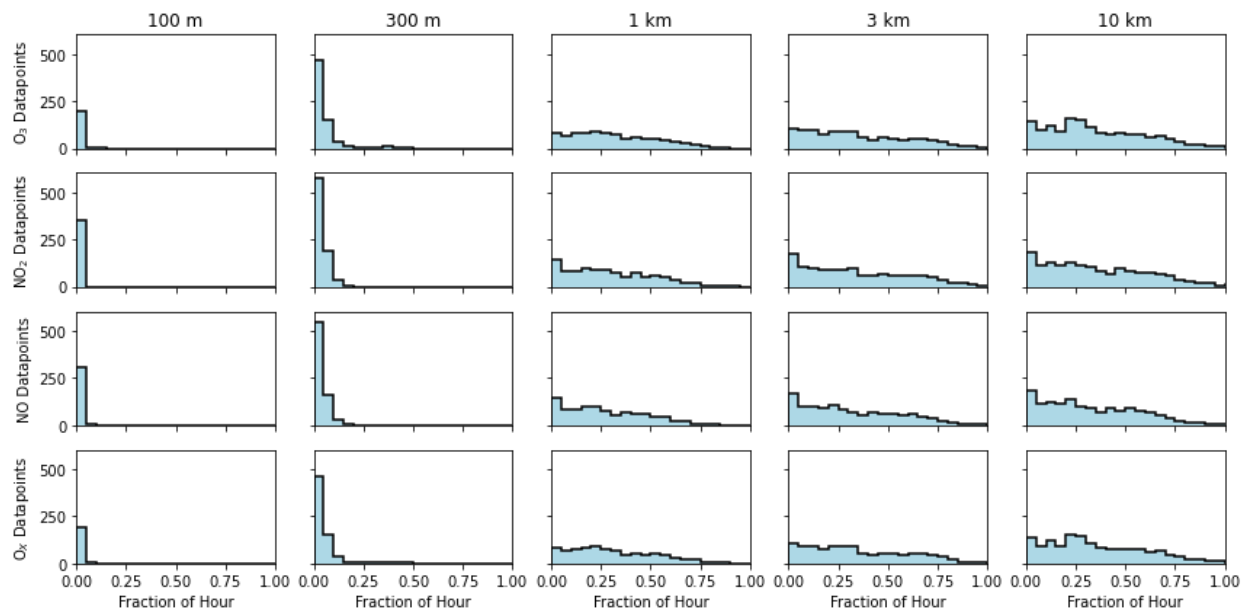

**Figure S4:** Fraction of each 3600 second period represented by valid 1-second measurements for the Residential subsets of the California dataset (Section 5.1). Each bar spans 0.05 hours (3 minutes).

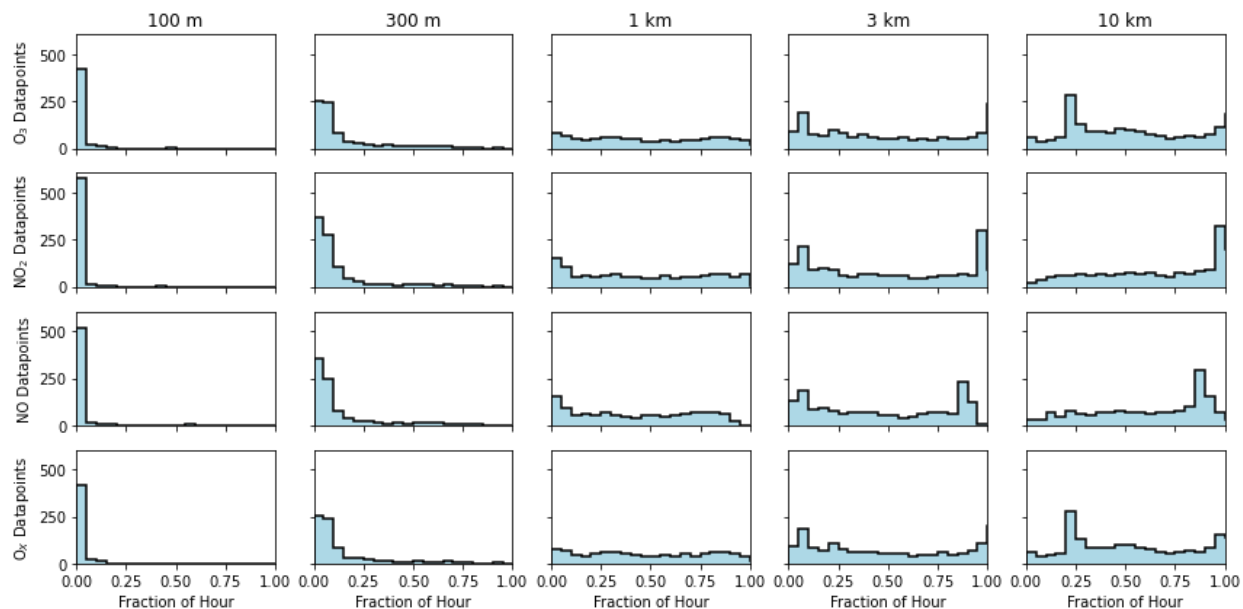

**Figure S5:** Fraction of each 3600 second period represented by 1-second measurements for the Non Highway subsets of the California dataset (Section 5.1). Each bar spans 0.05 hours.
